# Supplementary material for: Salt-resistant continuous solar evaporation composites based on nonwovens with synergistic photothermal effect of graphene oxide/copper sulphide
Source: Royal Society of Chemistry journal article supplement (doi:10.1039/d4ra05241b), 2024-01-01
Supplement: d4ra05241b1.pdf [file d4ra05241b1.pdf]

## Supplementary Material

### Notes S1. Heat losses analysis:

The main pathway of heat loss from the evaporator includes three portions: heat transfer to bulk water ( $Q_{Conduction}$ ), convective heat transfer into the air ( $Q_{Convection}$ ) and heat transfer into the surrounding ( $Q_{Radiation}$ ), as illustrated below[1-5].

#### (1) Radiative heat loss

The radiative heat loss ( $Q_{Radiation}$ ) to surroundings can be calculated according to Stefan-Boltzmann equation expressed as:

$$\Phi = \varepsilon A \sigma (T_s^4 - T_v^4)$$

$$Radiation\ loss = \frac{\Phi}{AP} = \frac{\varepsilon \sigma (T_s^4 - T_v^4)}{P}$$

Where  $\Phi$  ( $W\ m^{-2}$ ) is the radiation heat flux,  $A$  ( $m^2$ ) is the surface area,  $\sigma$  is the Stefan-Boltzmann constant ( $5.669 \times 10^{-8}\ W\ m^{-2}\ K^{-4}$ ),  $\varepsilon$  is the emissivity of material supposed as the maximum emissivity of 0.97 in this paper.  $T_s$  (316.5 K) is the surface temperature of evaporator at steady state under 1 sun illumination,  $T_v$  (311.4 K) is the adjacent environment temperature, and  $P$  is the irradiated sunlight power density. Therefore, the radiation heat flux is  $34.96\ W\ m^{-2}$ , which is 3.47% of the radiation heat loss (1 sun =  $1000\ W\ m^{-2}$ ).

#### (2) Conductive heat loss

The convective heat loss ( $Q_{Convection}$ ) to surroundings can be calculated as:

$$Convection\ loss = k \frac{T_1 - T_2}{P \Delta l}$$

Where  $k$  denotes the thermal conductivity of bulk water ( $0.599\ W\ m^{-1}\ K^{-1}$ ) [5]. The two embedded thermocouples were applied to monitor the water temperature, and the distance between the thermocouples ( $\Delta l$ ) is 5 mm. The average temperature at point 1 over one hour is about  $25.30\ ^\circ C$ . The average temperature

at point 2 over one hour is about 25.20°C. Consequently, the  $Q_{Conduction}$  is estimated to be 11.98 W m<sup>-2</sup>, corresponding to a conductive heat loss of 1.198%..

### **(3) Convective heat loss**

The convective heat loss ( $Q_{Convection}$ ) to surroundings can be calculated as:

$$Convection\ loss = h \frac{T_s - T_v}{P}$$

where h represents the convection heat transfer coefficient which is set to be 2.24 J m<sup>-2</sup> s<sup>-1</sup> K<sup>-1</sup> here [1].,

$T_s$  is surface temperature of the evaporator.  $T_v$  is the adjacent environment temperature. Consequently, the

$Q_{Convection}$  is estimated to be 11.42 W m<sup>-2</sup>, corresponding 1.14%.

Based on these analyses, the total heat loss for our evaporator is approximately 5.808%, representing a solar-to-vapor conversion efficiency of 94.092%.

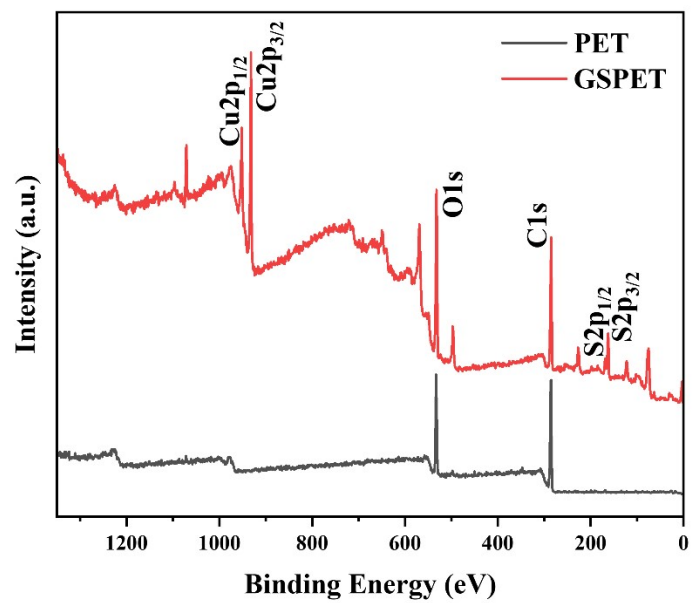

**Figure S1** XPS full scan spectra of GSPET and PET.

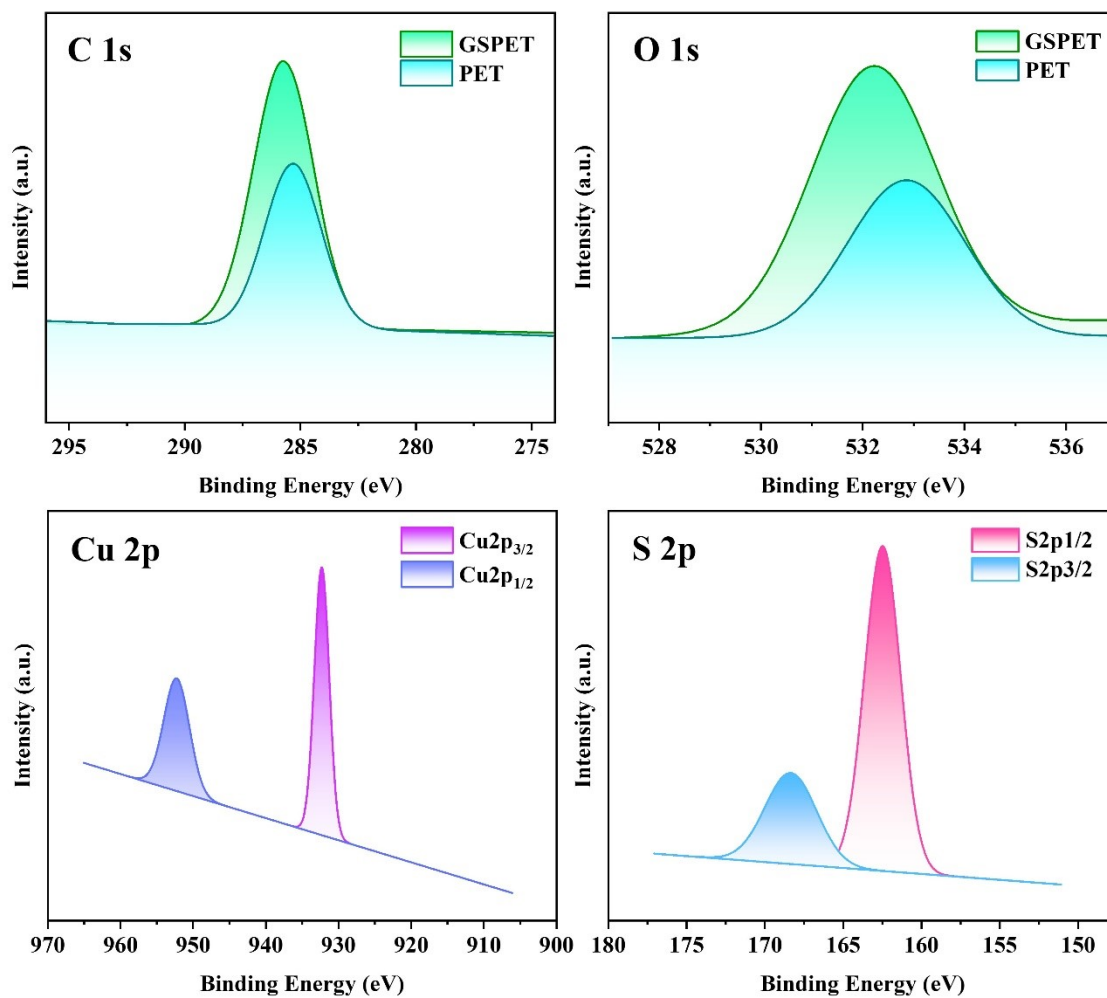

**Figure S2 High-resolution XPS spectra of C 1s, O 1s, Cu 2p, and S 2p from GSPET.**

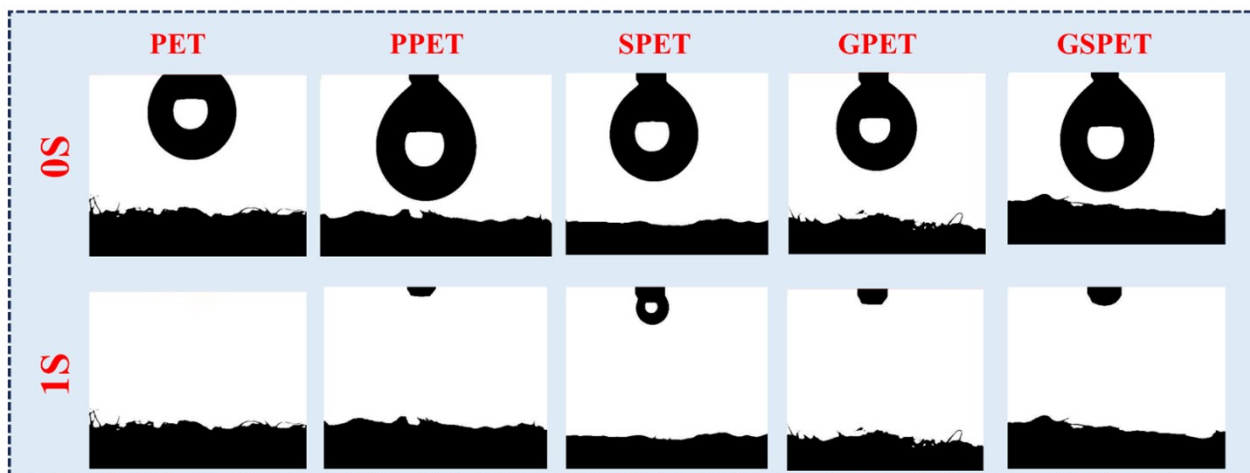

Figure.S3. Hydrophilicity of samples PET,PPET,GPET,SPET and GSPET.

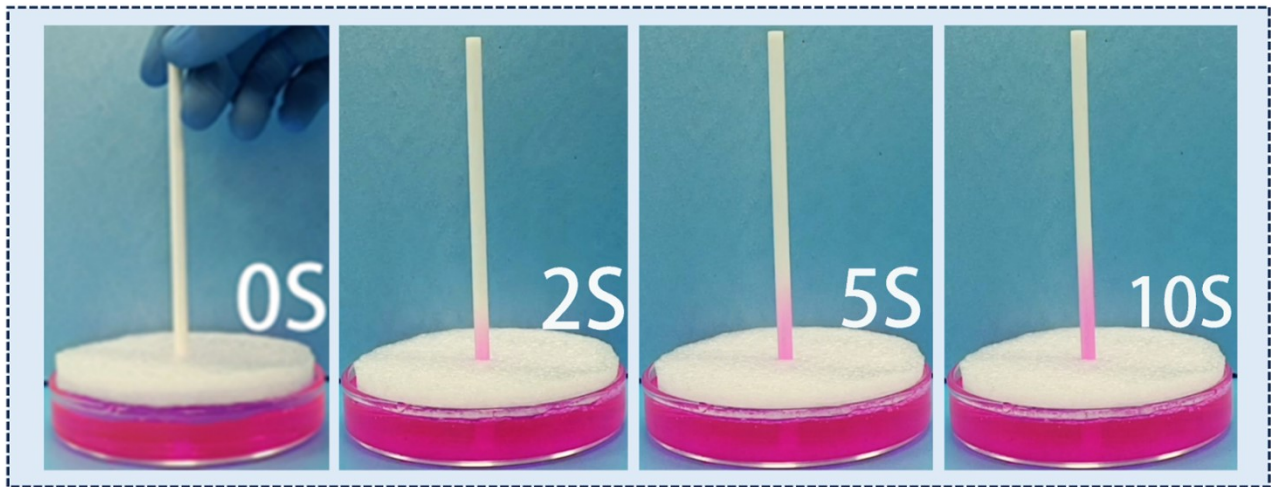

Figure.S4. Hydrophilicity of WHF water-conducting rods.

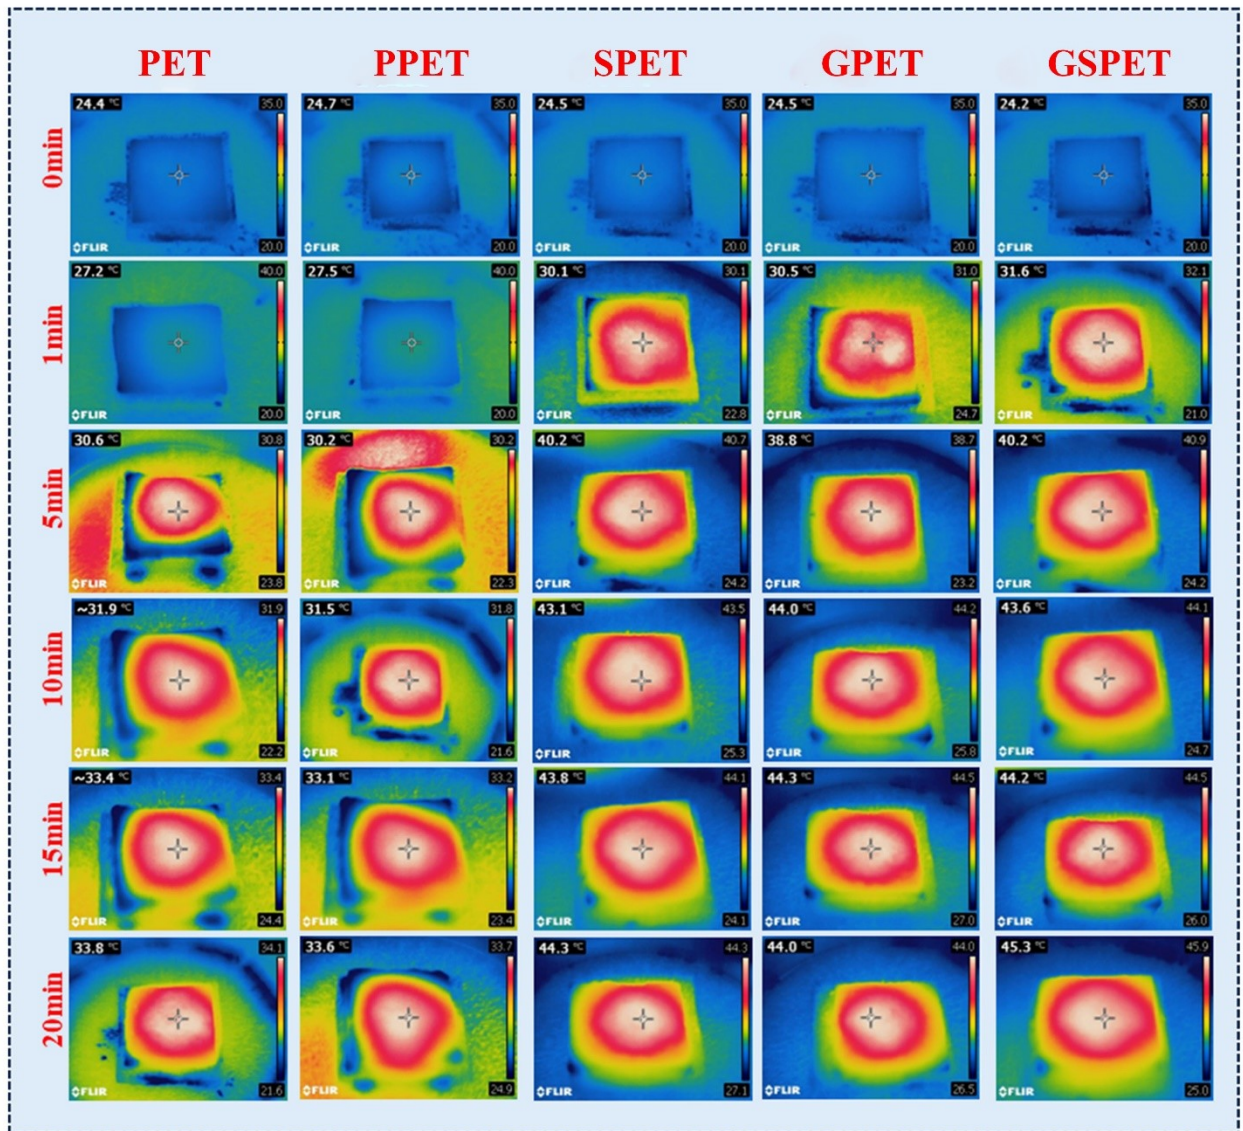

Figure.S5. Infrared photographs of the wet state warming process of samples PET, PPET, GPET, SPET and GSPET.

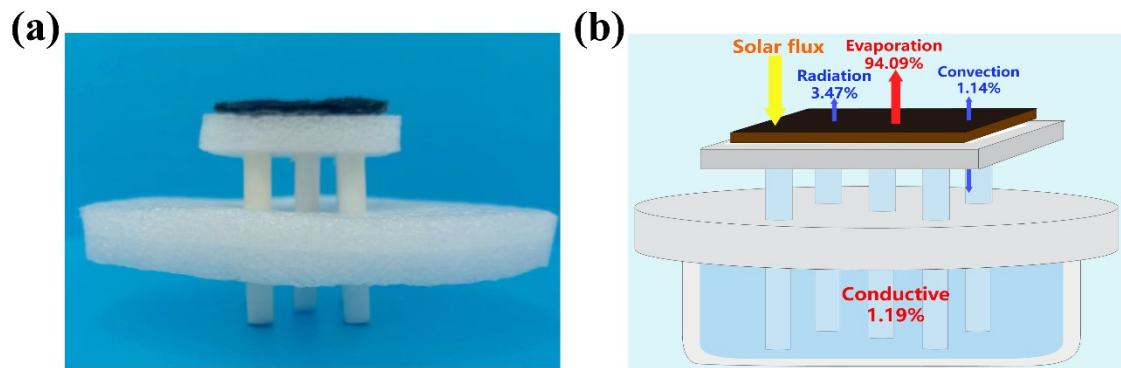

Figure.S6. (a)Physical drawing of evaporator structure. (b)Heat loss data chart.



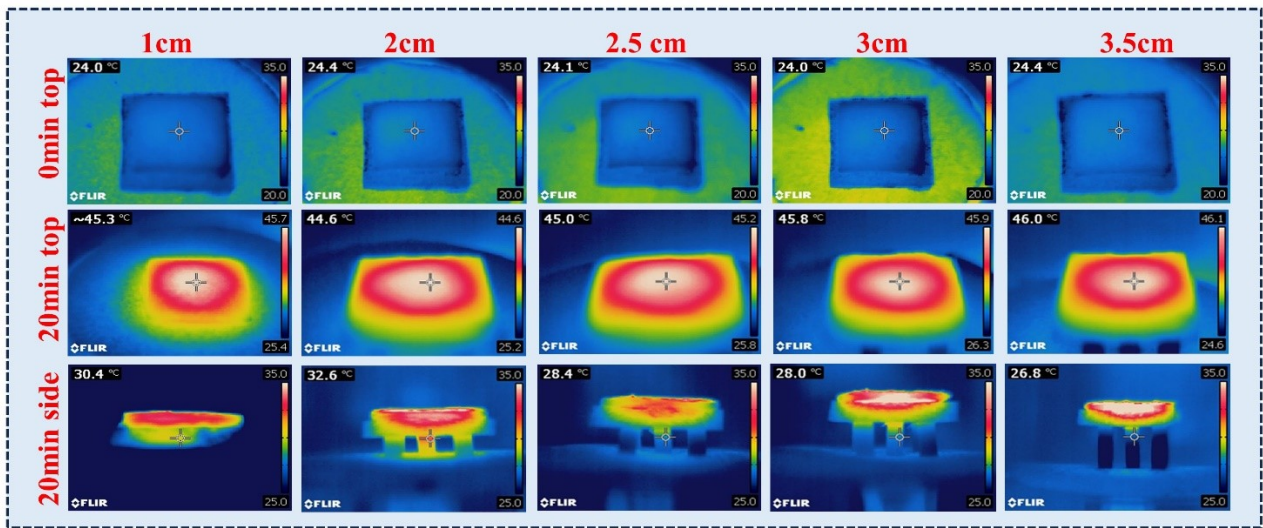

Figure.S7. Wet infrared photographs of the evaporator photothermal layer and water guide rods at different heights.

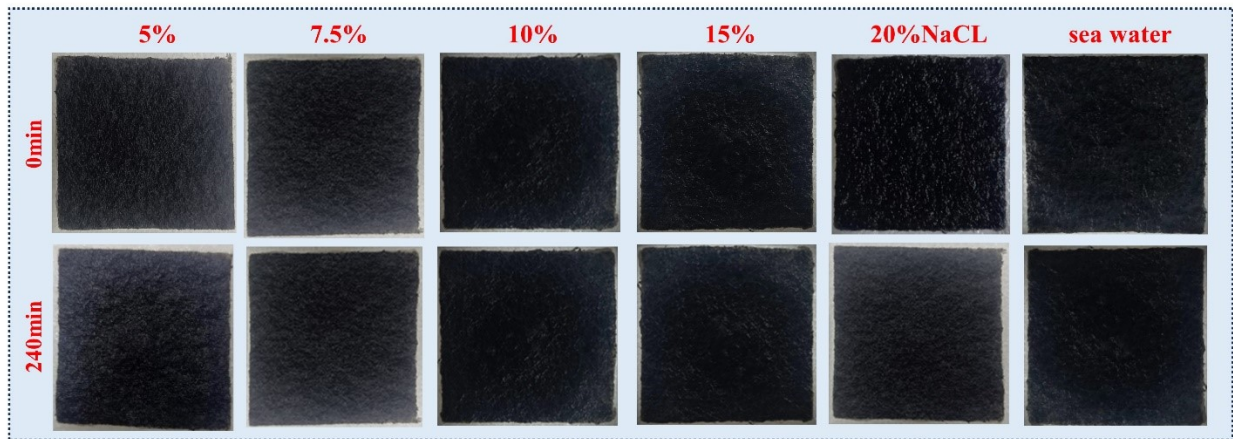

**Figure.S8. Photographs of the surface of GSPET samples before and after 240 minutes of evaporation with different concentrations of NaCl and real seawater.**

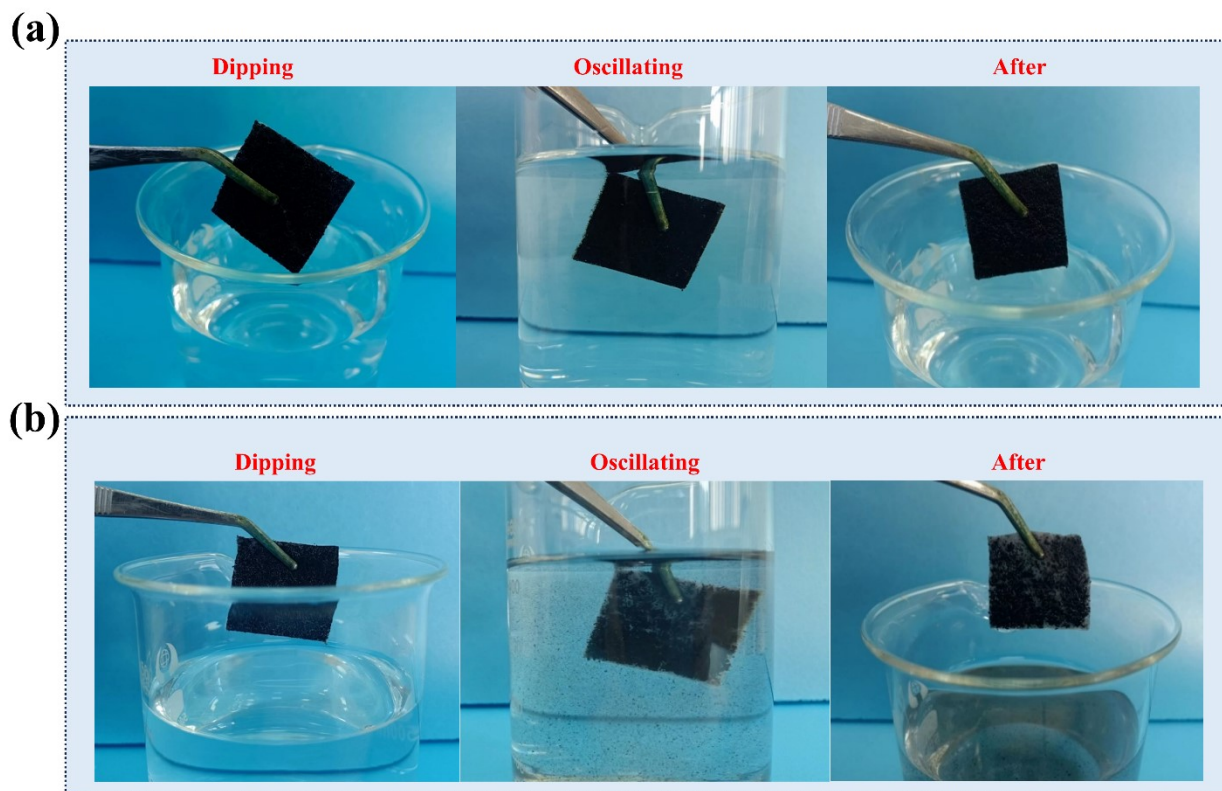

Figure.S9. Photographs of the water washing process of the photothermal layer with (b) without (c) adhesive PVA.

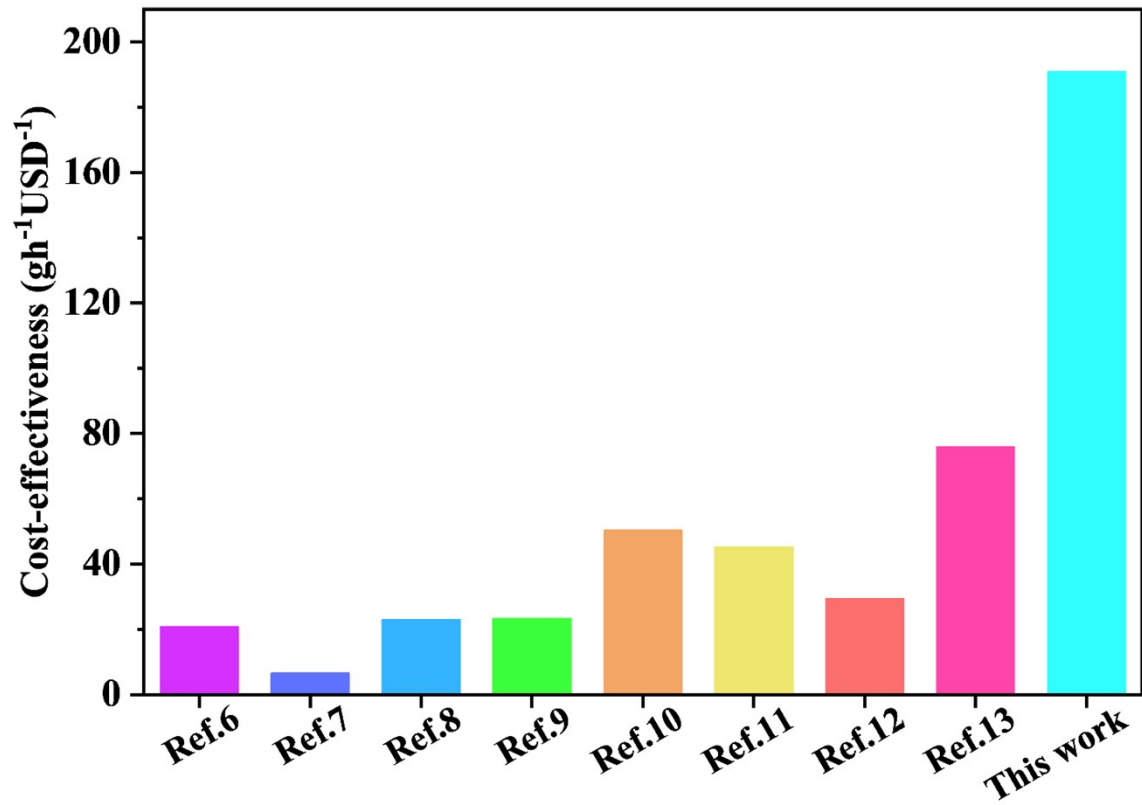

Figure.S10. Comparison of cost-effectiveness between this work and relevant literature.

**Table S1.** The evaporation rate and corresponding solar-to-vapor efficiency of the reported materials under 1-Sun irradiation.

| Materials                                     | Efficiency (%) | Evaporation rate<br>(kg m <sup>-2</sup> h <sup>-1</sup> ) | Reference |
|-----------------------------------------------|----------------|-----------------------------------------------------------|-----------|
| MXene membrane                                | 87.1           | 1.54                                                      | [14]      |
| PPy-CF fabric                                 | 90.45          | 1.56                                                      | [15]      |
| DM/PVA/Fe <sub>2</sub> O <sub>3</sub> @cotton | 82.9           | 1.32                                                      | [16]      |
| MWCNT@PP/PE                                   | 89.7           | 1.44                                                      | [17]      |
| Chitosan/Mxene/fabric (CMF)                   | 88.5           | 1.35                                                      | [18]      |
| MXene/carbon cotton                           | 88.2           | 1.35                                                      | [19]      |
| CuO@PDA/PB                                    | 87.10          | 1.39                                                      | [20]      |
| PDA@CNT/ES nonwoven                           | 90.77          | 1.29                                                      | [13]      |
| GO/Cu <sub>x</sub> S nonwoven                 | 94.6           | 1.54                                                      | This work |

**Table S2.** Estimation of the total cost of the prototype with 1 m<sup>2</sup> PDA/CNT@ES absorber. The price of all the consumables were in bulk scale.

| Materials                             | Price ¥ (\$)               | Amount            | Cost (\$) |
|---------------------------------------|----------------------------|-------------------|-----------|
| PET non-woven (110 g/m <sup>2</sup> ) | \$ 0.277 m <sup>-2</sup>   | 1.0m <sup>2</sup> | 0.0152    |
| EVA Foam (1m*1m*100mm)                | \$ 0.1921 m <sup>-2</sup>  | 1.0m <sup>2</sup> | 0.1921    |
| Spunlaced cotton(80g/m <sup>2</sup> ) | \$ 1.25 m <sup>-2</sup>    | 1.0m <sup>2</sup> | 0.0101    |
| CB                                    | \$ 2.0833 kg <sup>-1</sup> | 5.0 g             | 0.0104    |
| Gallic acid                           | \$ 30.66 kg <sup>-1</sup>  | 20.0 g            | 0.6133    |
| Polyetherimide                        | \$ 69.28 kg <sup>-1</sup>  | 12.0g             | 0.8314    |
| NaOH                                  | \$5.54 kg <sup>-1</sup>    | 20.0g             | 0.1108    |
| Na <sub>2</sub> S                     | \$50 L <sup>-1</sup>       | 15.0ml            | 0.7575    |
| CuCl <sub>2</sub> ·2H <sub>2</sub> O  | \$17.91 kg <sup>-1</sup>   | 24.0g             | 0.4301    |
| Polydimethylsiloxane                  | \$193.88L <sup>-1</sup>    | 5.0ml             | 0.0096    |
| Ethyl acetate                         | \$5.9444L <sup>-1</sup>    | 250.0ml           | 1.4860    |

Thus, the total cost of the prototype with 1 m<sup>2</sup> CSPT can be estimated to be:

Total cost of CSP = 4.4666 dollars.

## References

- [1] F. Yu, Z. Guo, Y. Xu, Z. Chen, M. S. Irshad, J. Qian, T. Mei and X. Wang, *ACS Applied Materials & Interfaces*, 2020, **12**, 57155-57164.
- [2] P. Sun, W. Zhang, I. Zada, Y. Zhang, J. Gu, Q. Liu, H. Su, D. Pantelić, B. Jelenković and D. Zhang, *ACS Applied Materials & Interfaces*, 2019, **12**, 2171-2179.
- [3] R. Song, N. Zhang, P. Wang, H. Ding, J. Wang and S. Li, *Applied Surface Science*, 2023, **616**.
- [4] W. Huang, P. Su, Y. Cao, C. Li, D. Chen, X. Tian, Y. Su, B. Qiao, J. Tu and X. Wang, *Nano Energy*, 2020, **69**.
- [5] J. Zhang, Z. Li, T. Meng, S. Zang, C. Yang, X. Luo, H. Wang, J. Chen, F. Jing, C. Wang, H. Xu and Y. Zhou, *Chemical Engineering Journal*, 2022, **450**.
- [6] N. Hu, Y. Xu, Z. Liu, M. Liu, X. Shao and J. Wang, *Carbohydrate Polymers*, 2020, **243**.
- [7] Y. Lu, D. Fan, Y. Wang, H. Xu, C. Lu and X. Yang, *ACS Nano*, 2021, **15**, 10366-10376.
- [8] J. He, Y. Fan, C. Xiao, F. Liu, H. Sun, Z. Zhu, W. Liang and A. Li, *Composites Science and Technology*, 2021, **204**.
- [9] Y. Wu, L. Shen, C. Zhang, H. Gao, J. Chen, L. Jin, P. Lin, H. Zhang and Y. Xia, *Desalination*, 2021, **505**.

- [10] S. Sun, B. Sun, Y. Wang, M. Fordjour Antwi-Afari, H.-Y. Mi, Z. Guo, C. Liu and C. Shen, *Separation and Purification Technology*, 2021, **278**.
- [11] L. Zhao, P. Wang, J. Tian, J. Wang, L. Li, L. Xu, Y. Wang, X. Fei and Y. Li, *Science of The Total Environment*, 2019, **668**, 153-160.
- [12] T. Xu, Y. Xu, J. Wang, H. Lu, W. Liu and J. Wang, *Chemical Engineering Journal*, 2021, **415**.
- [13] T. Li, M. Lin, H. Lu, Y. Chen, C. Zhang and H. Qi, *Journal of Environmental Chemical Engineering*, 2023, **11**.
- [14] C. Niu, L. Yang, H. Sun, Z. Zhu, W. Liang, J. Li and A. Li, *Chemical Engineering Journal*, 2023, **476**.
- [15] X. Zhao, Y. Tang, J. Wang, Y. Li, D. Li, X. Zuo and H. Yang, *ACS Applied Materials & Interfaces*, 2023, **15**, 49132-49145.
- [16] Z. Bai, H. Xu, B. Yang, J. Yao, G. Li, K. Guo, N. Wang and N. Liang, *Materials*, 2022, **15**.
- [17] T. Li, M. Lin, H. Lu, Y. Chen, C. Zhang and H. Qi, *Journal of Environmental Chemical Engineering*, 2023, **11**.
- [18] Z. Wu, J. Li, S. Zhang, J. Yan, J. Gao, N. Zheng and H. Xue, *Journal of Colloid and Interface Science*, 2022, **622**, 169-180.
- [19] Y. Wang, Q. Qi, J. Fan, W. Wang and D. Yu, *Separation and Purification Technology*, 2021, **254**.
- [20] R. Zhu, M. Liu, Y. Hou, D. Wang, L. Zhang, D. Wang and S. Fu, *Chemical Engineering Journal*, 2021, **423**.
